# Supplementary material for: Exome sequencing of 1190 non-syndromic clubfoot cases reveals HOXD12 as a novel disease gene
Source: PubMed Central journal article supplement — J Med Genet. 2024 Apr 25;61(7):699–706. doi: 10.1136/jmg-2024-109846 (PMC11228210; doi:10.1136/jmg-2024-109846), 2024-04-25
Supplement: jmg-2024-109846supp002.pdf [file jmg-2024-109846supp002.pdf]

## Supplemental Information

### Figure S1. Pedigrees and localization of *PITX1* variants

A. Localization of *PITX1* variants identified in the study along the protein. Yellow motif represents homeobox domain. B. Pedigrees of *LMX1B* families

### Figure S2. Protein sequence alignment of *PITX1*

This multiple sequence alignment of *PITX1* protein across different species show conservation and the localization of *PITX1* variants identified in this study.

### Figure S3. Protein sequence alignment of *HOXD12*

This multiple sequence alignment of *HOXD12* protein across different species show conservation and the localization of *HOXD12* variants identified in this study.

### Figure S4. Pedigrees of segregated *HOX* families

### Figure S5. Pedigrees of *LMX1B* families

### Figure S6. Pedigrees of *COL9A3* families

### Figure S7. Pedigrees of *COL15A1* families

### Table S1. Filters used in gene burden analysis

NFE: non-Finish European; AC: allele count; AF: allele frequency.

**Table S2. Detailed Information for Enriched genes in burden analysis**

AR: autosomal recessive; AD: autosomal dominant.

Inheritance and musculoskeletal phenotypes: a brief phenotype description from OMIM and MGI (Mouse Genome Informatics) databases. If the genes are not OMIM disease genes, we provide skeletal or limb/digit phenotypes from mouse studies if there is any.

Related: gene involved in limb-related phenotypes/functions. This information is used to prioritize our enriched genes. "Yes" indicates the gene has limb-related phenotypes/functions, "No" indicates no related phenotype/function, and "Maybe" indicates gene with skeletal related phenotype, such as osteogenesis imperfecta, but does not have strong link to limb phenotype.

**Table S3. Candidate SNVs in prioritized enriched genes in clubfoot cohort**

Relative.Degree: if there are relatives with clubfoot. If there are first degree relatives with clubfoot, the information is marked as Yes/First Degree

AF\_nfe: allele frequency from gnomAD non-Finish European data

limb\_samples: sample(s) carry this variant in the cohort

CLNSIG: reported clinical significance in ClinVar

CLNDN: reported clinical phenotype reported in ClinVar

InterVar\_automated: predicted clinical significance in InterVar

ACMG: the category of variants based on ACMG guideline

Segregation: segregation results. "NA" means no other family members to test segregation;

"Potentially" means inherited from the parent with family history; "TRUE" means the variant

segregate with the phenotype; "De novo" means both parents do not have phenotype and do not have the variant

Dz.model: disease model (HET: heterozygous; HOM: homozygous)

TRAPD\_public: whether the variant is included in 857 clubfoot patients in the TRAPD assay using gnomAD non-Finish European data. "TRUE" means the variant is included in the burden analysis. "SCREEN" means the variant is obtained by screening throughout the whole cohort.

TRAPD\_inhouse: whether the variant is included in 857 clubfoot patients in the TRAPD assay using in-house Caucasian controls. "TRUE" means the variant is included in the burden analysis. "SCREEN" means the variant is obtained by screening throughout the whole cohort.

PATH: pathogenic

VUS: Variant of Uncertain Significance

self-reported Ethnicity: NA means not reported

other genetic factors: whether there are additional possibly causative genetic findings in the exome for the indicated person. "NA" means we did not identify additional possibly causative genetic factors.

#### **Table S4. Candidate SNVs in other posterior *HOX* genes in clubfoot cohort**

Relative.Degree: if there are relatives with clubfoot. If there are first degree relatives with clubfoot, the information is marked as Yes/First Degree

AF\_nfe: allele frequency from gnomAD non-Finish European data

limb\_samples: sample(s) carry this variant in the cohort

CLNSIG: reported clinical significance in ClinVar

CLNDN: reported clinical phenotype reported in ClinVar

InterVar\_automated: predicted clinical significance in InterVar

ACMG: the category of variants based on ACMG guideline

Segregation: segregation results. "NA" means no other family members to test segregation; "Potentially" means inherited from the parent with family history; "TRUE" means the variant segregate with the phenotype; "De novo" means both parents do not have phenotype and do not have the variant

Dz.model: disease model (HET: heterozygous; HOM: homozygous)

TRAPD\_public: whether the variant is included in 857 clubfoot patients in the TRAPD assay using gnomAD non-Finish European data. "TRUE" means the variant is included in the burden analysis. "SCREEN" means the variant is obtained by screening throughout the whole cohort.

TRAPD\_inhouse: whether the variant is included in 857 clubfoot patients in the TRAPD assay using in-house Caucasian controls. "TRUE" means the variant is included in the burden analysis. "SCREEN" means the variant is obtained by screening throughout the whole cohort.

PATH: pathogenic

VUS: Variant of Uncertain Significance

self-reported Ethnicity: NA means not reported

other genetic factors: whether there are additional possibly causative genetic findings in the exome for the indicated person. "NA" means we did not identify additional possibly causative genetic factors.

### **Table S5. Gene and region burden results for *COL12A1***

gnomAD TRAPD: TRAPD assay using gnomAD non-Finish European data

in-house TRAPD: TRAPD assay using in-house Caucasian controls

P\_DOM: p value in dominant mode of TRAPD

CASE: count in cases

CONTROL: count in controls

COL12A1\_whole: the whole COL12A1 region, including both isoforms

COL12A1\_diff: the unique region encoding the long isoform

COL12A1\_share: the shared regions between the long and short isoforms of COL12A1

**Table S6. Candidate SNVs in *COL15A1* in clubfoot cohort**

Relative.Degree: if there are relatives with clubfoot. If there are first degree relatives with clubfoot, the information is marked as Yes/First Degree

AF\_nfe: allele frequency from gnomAD non-Finish European data

limb\_samples: sample(s) carry this variant in the cohort

CLNSIG: reported clinical significance in ClinVar

CLNDN: reported clinical phenotype reported in ClinVar

InterVar\_automated: predicted clinical significance in InterVar

ACMG: the category of variants based on ACMG guideline

Segregation: segregation results. "NA" means no other family members to test segregation;

"Potentially" means inherited from the parent with family history; "TRUE" means the variant

segregate with the phenotype; "De novo" means both parents do not have phenotype and do not have the variant

Dz.model: disease model (HET: heterozygous; HOM: homozygous)

TRAPD\_public: whether the variant is included in 857 clubfoot patients in the TRAPD assay using gnomAD non-Finish European data. "TRUE" means the variant is included in the burden analysis. "SCREEN" means the variant is obtained by screening throughout the whole cohort.

TRAPD\_inhouse: whether the variant is included in 857 clubfoot patients in the TRAPD assay using in-house Caucasian controls. "TRUE" means the variant is included in the burden analysis. "SCREEN" means the variant is obtained by screening throughout the whole cohort.

PATH: pathogenic

VUS: Variant of Uncertain Significance

other genetic factors: whether there are additional possibly causative genetic findings in the exome for the indicated person. "NA" means we did not identify additional possibly causative genetic factors.

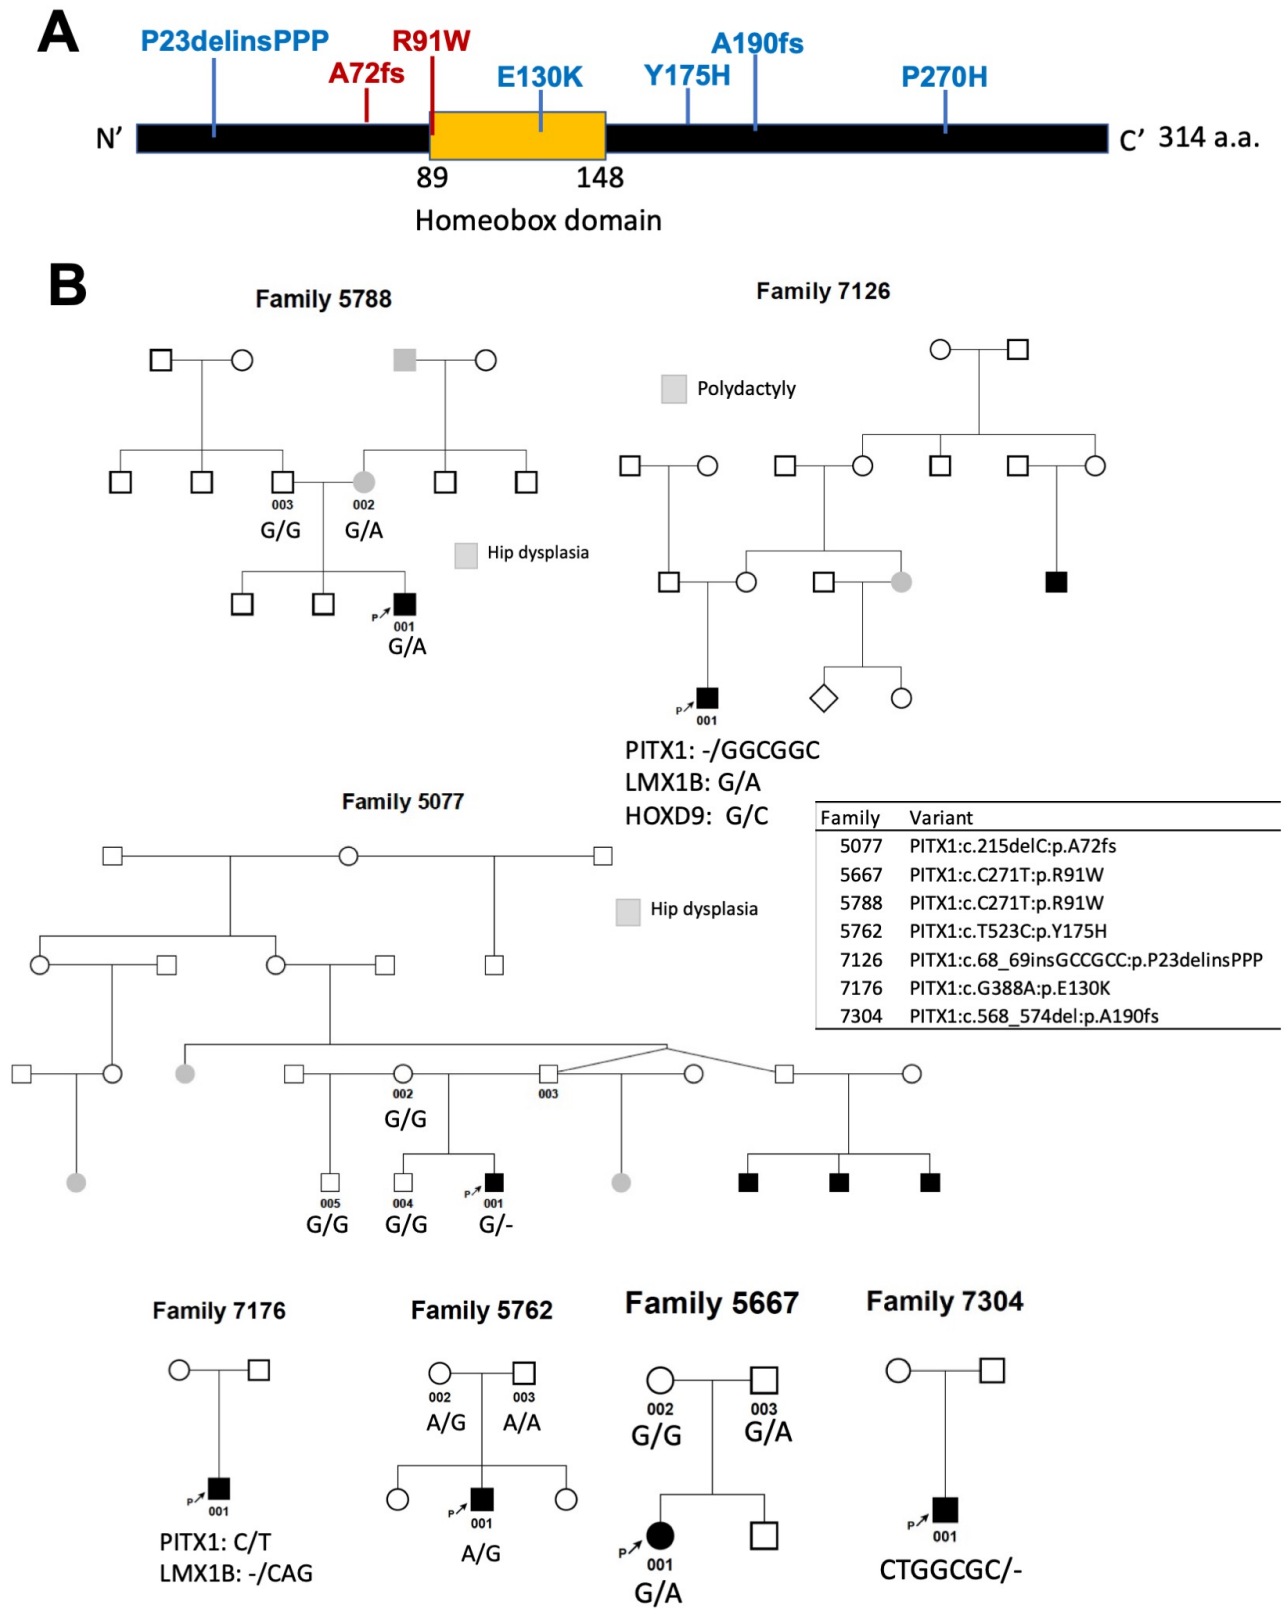

**Figure S1. Pedigrees and localization of *PITX1* variants**



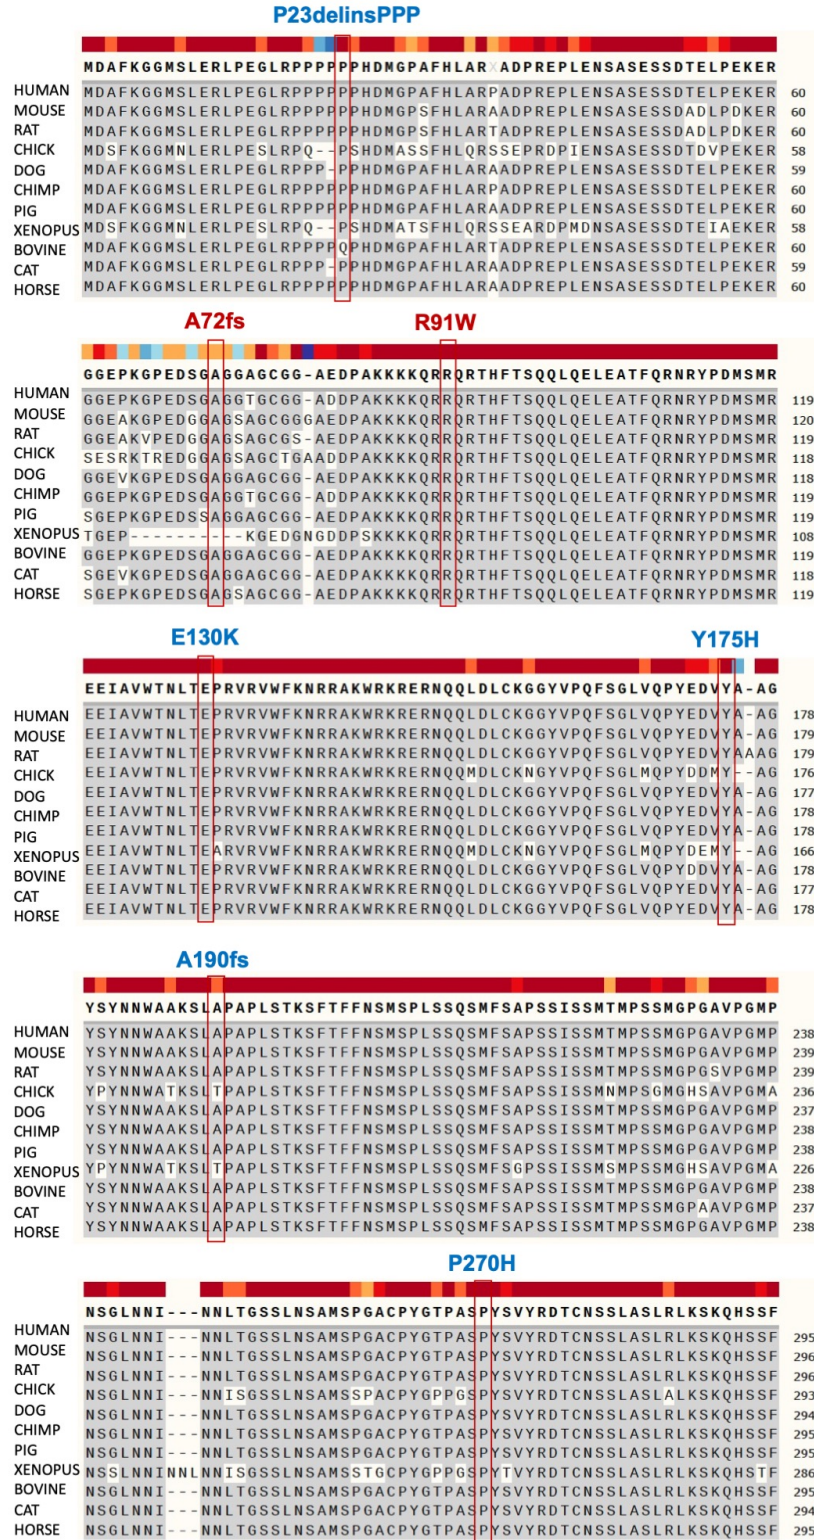

Figure S2. Protein sequence alignment of PITX1



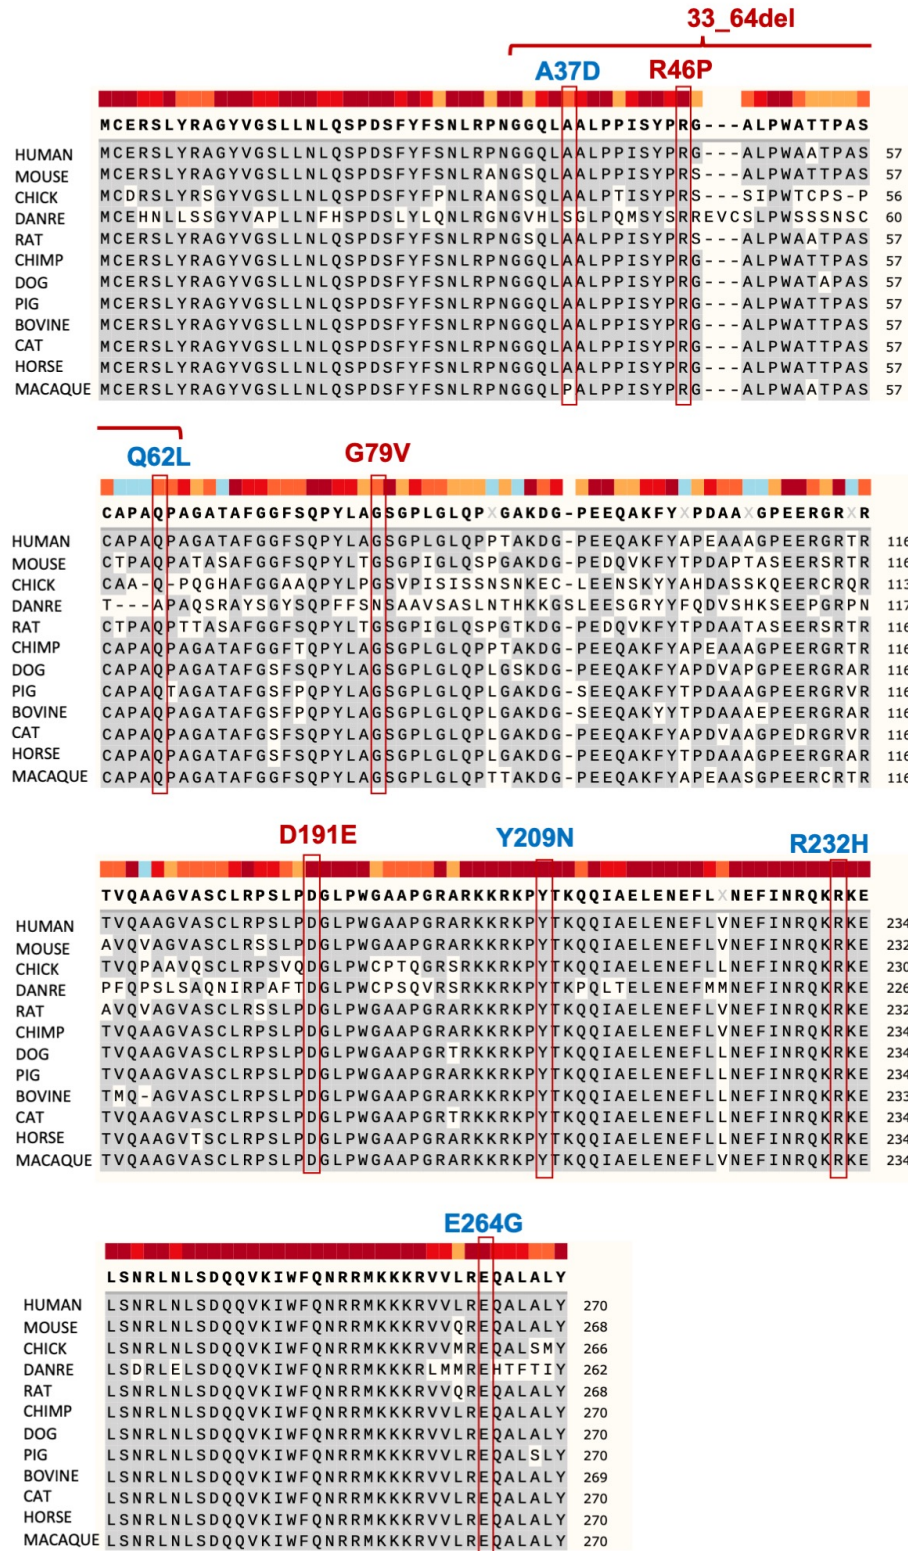

**Figure S3. Protein sequence alignment of HOXD12**

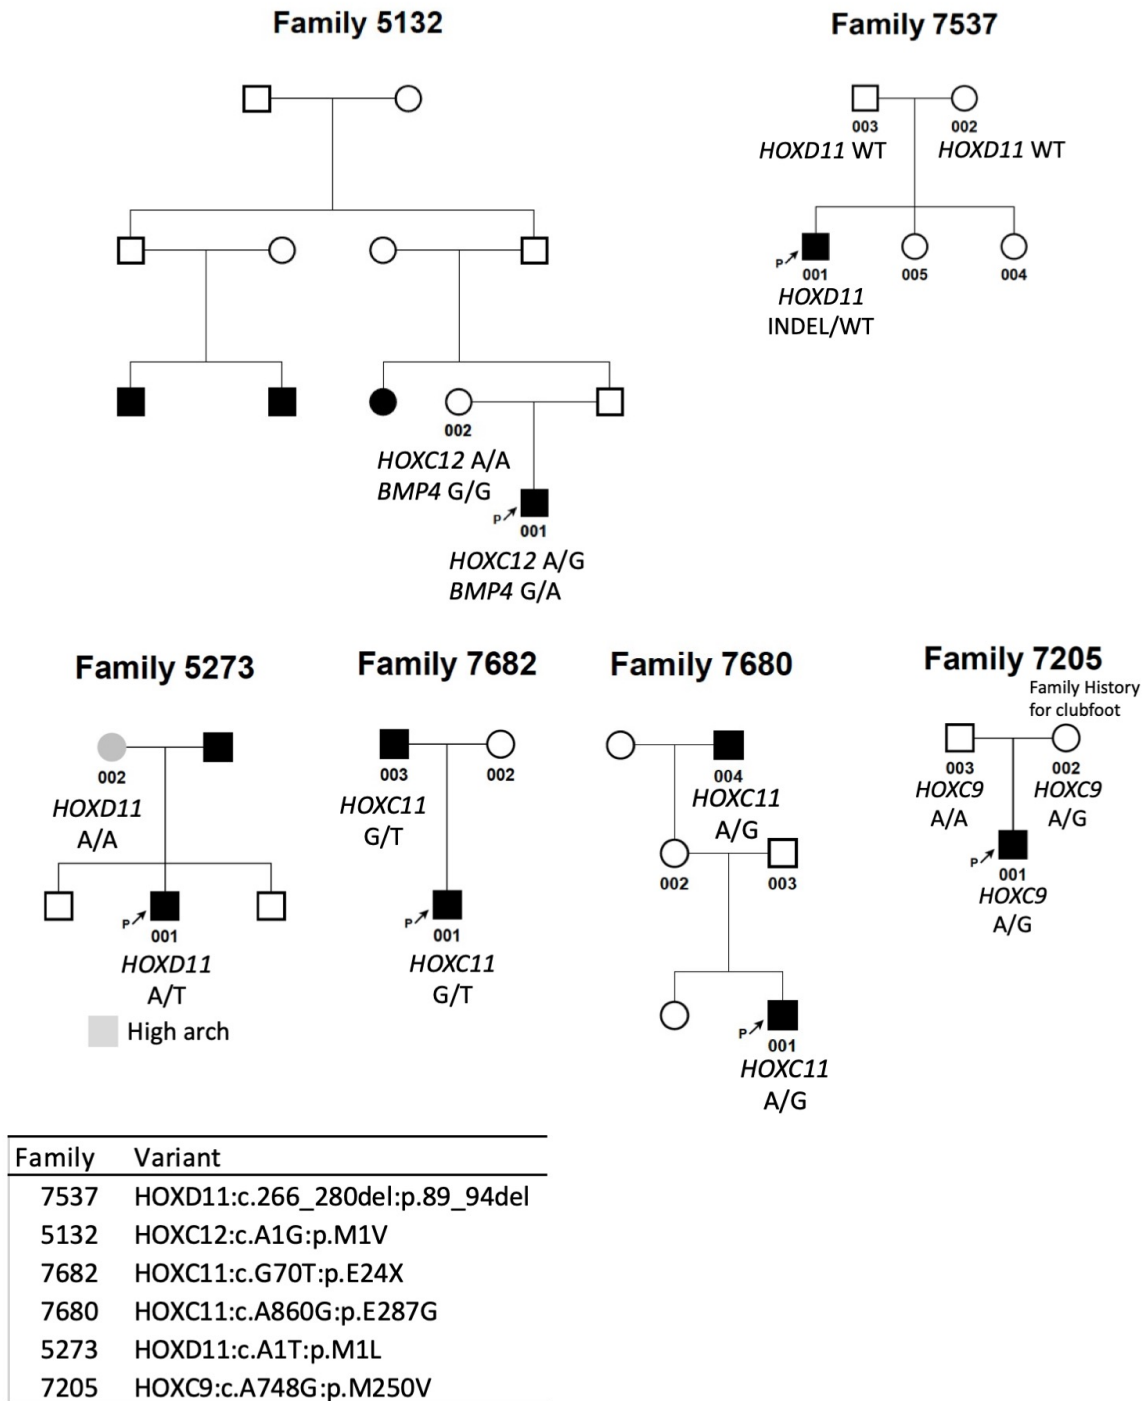

**Figure S4. Pedigrees of segregated HOX families**

## Figure S5. Pedigrees of LMX1B families

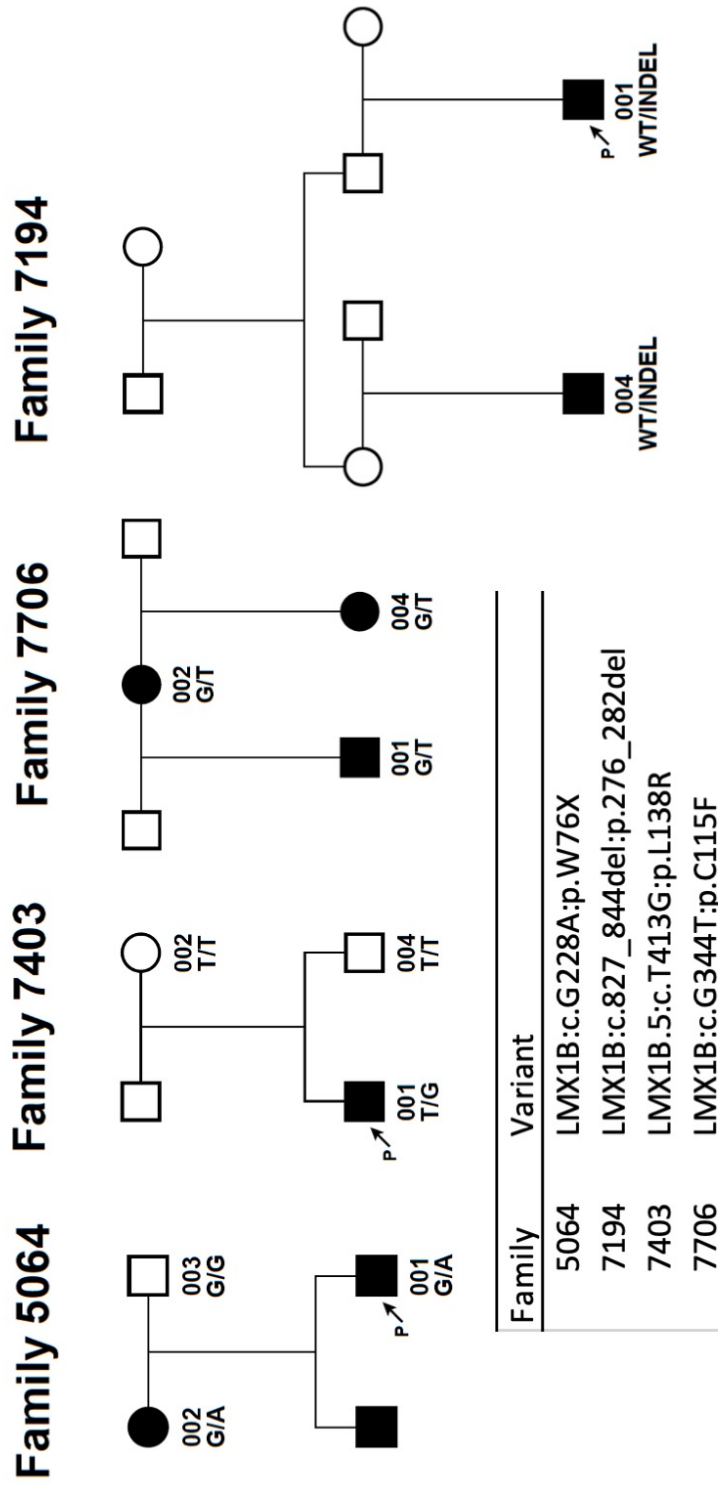

# Figure S6. Pedigrees of COL9A3 families

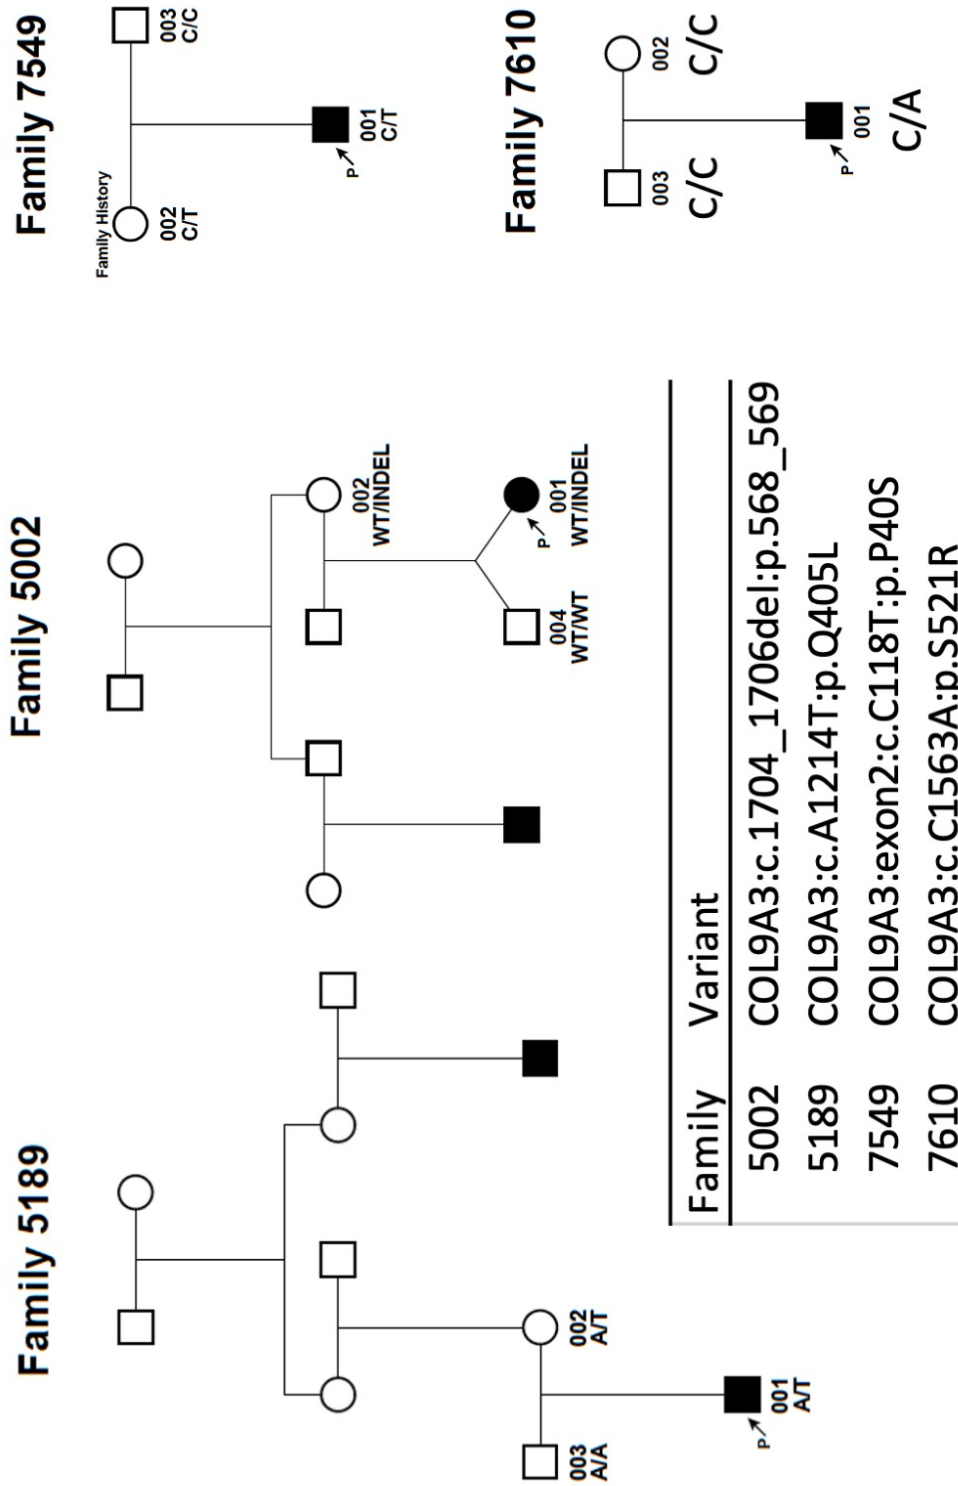

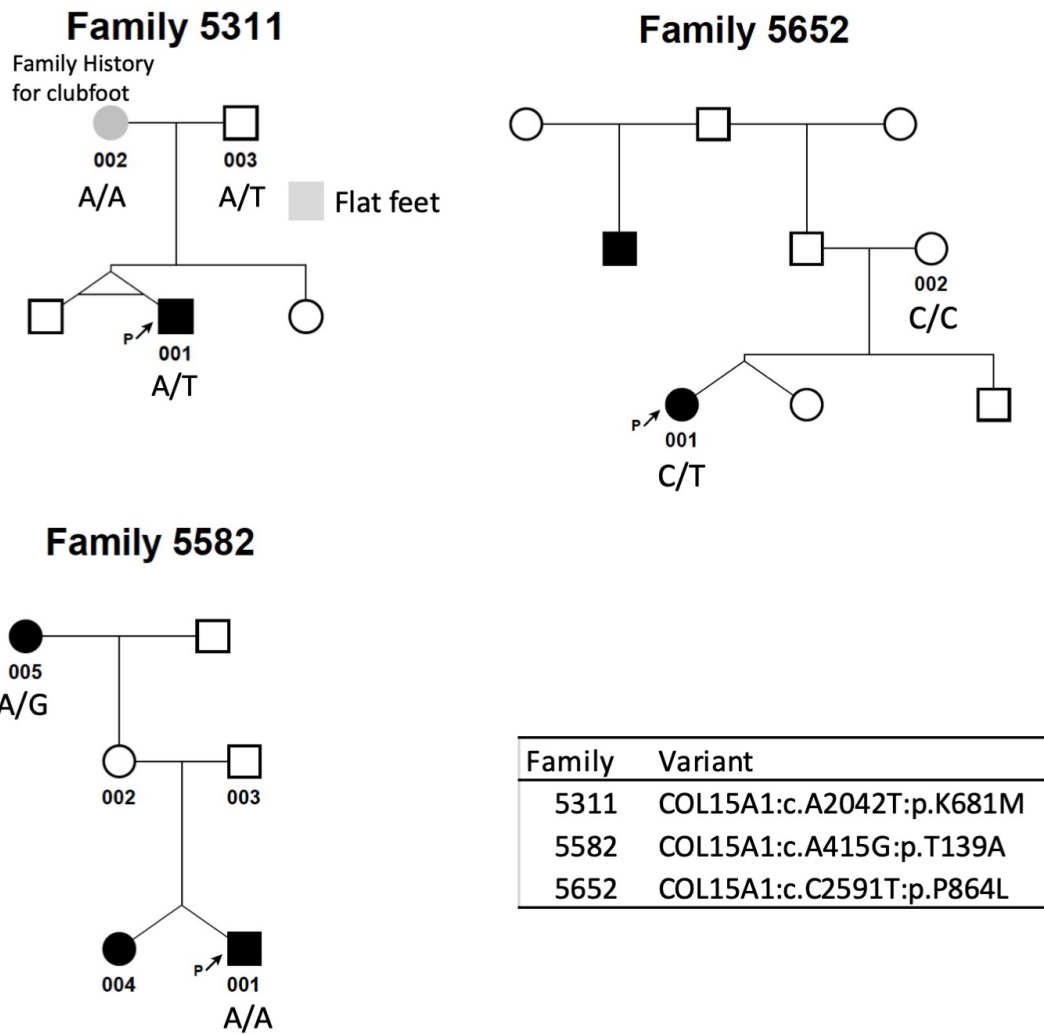

**Figure S7. Pedigrees of COL15A1 families**
